# Supplementary material for: Transcriptome analysis reveals the long intergenic noncoding RNAs contributed to skeletal muscle differences between Yorkshire and Tibetan pig
Source: Sci Rep. 2021 Jan 29;11:2622. doi: 10.1038/s41598-021-82126-2 (PMC7846844; doi:10.1038/s41598-021-82126-2)
Supplement: Supplementary file 4 — Supplementary Table S2. [file 41598_2021_82126_MOESM4_ESM.xlsx]

## Sheet: Sheet1
Table S2.Gene ontology and pathway analysis of adjacent genes of lincRNAs.
_MEMBER_Input ID	_LogP_Input ID	GO	_PATTERN_	_RANK_	GiniIndex	Category	CategoryID	Description	LogP	Enrichment	Z-score	#TotalGeneInLibrary	#GeneInGO	#GeneInHitList	#GeneInGOAndHitList	%InGO	STDV %InGO	GeneID	Hits	Log(q-value)	EvidenceCutoff	GROUP_ID	FirstInGroupByEnrichment	FirstInGroupByLogP	BestLogPInGroup	BestEnrichmentInGroup
1	-4.76052	GO:0061061	M1	1	0	GO Biological Processes	19	muscle structure development	-4.76052	2.86161	5.14289	24155	674	263	21	7.98479	1.67141	58|70|104|1385|2047|3020|3481|5155|6664|6722|7140|9099|10939|22989|28514|51176|79652|84814|196541|221937|389072	ACTA1|ACTC1|ADARB1|CREB1|EPHB1|H3-3A|IGF2|PDGFB|SOX11|SRF|TNNT3|USP2|AFG3L2|MYH15|DLL1|LEF1|TMEM204|PLPP7|METTL21C|FOXK1|PLEKHM3	-0.563216	0	1	1	1	-4.76052	3.44415
1	-2.71987	GO:0007517	M1	1	0	GO Biological Processes	19	muscle organ development	-2.71987	2.68812	3.61706	24155	410	263	12	4.56274	1.28675	58|70|104|1385|2047|6664|9099|22989|28514|51176|196541|221937	ACTA1|ACTC1|ADARB1|CREB1|EPHB1|SOX11|USP2|MYH15|DLL1|LEF1|METTL21C|FOXK1	-0.154252	0	1	0	0	-4.76052	3.44415
1	-2.08142	GO:0007519	M1	1	0	GO Biological Processes	19	skeletal muscle tissue development	-2.08142	3.44415	3.25443	24155	160	263	6	2.28137	0.92068	58|2047|6664|22989|28514|196541	ACTA1|EPHB1|SOX11|MYH15|DLL1|METTL21C	-0.0551432	0	1	0	0	-4.76052	3.44415
1	-4.51962	GO:0009792	M1	1	0	GO Biological Processes	19	embryo development ending in birth or egg hatching	-4.51962	2.84347	4.98289	24155	646	263	20	7.60456	1.6345	100|2778|3481|4695|5155|5754|6664|6722|7477|7855|8915|9742|26005|28514|51176|55224|55746|57623|83552|286204	ADA|GNAS|IGF2|NDUFA2|PDGFB|PTK7|SOX11|SRF|WNT7B|FZD5|BCL10|IFT140|C2CD3|DLL1|LEF1|ETNK2|NUP133|ZFAT|MFRP|CRB2	-0.563216	0	2	1	1	-4.51962	5.15978
1	-4.17796	GO:0043009	M1	1	0	GO Biological Processes	19	chordate embryonic development	-4.17796	2.77431	4.7307	24155	629	263	19	7.22433	1.59639	100|2778|3481|4695|5155|5754|6664|6722|7477|7855|8915|9742|26005|28514|51176|55224|55746|57623|286204	ADA|GNAS|IGF2|NDUFA2|PDGFB|PTK7|SOX11|SRF|WNT7B|FZD5|BCL10|IFT140|C2CD3|DLL1|LEF1|ETNK2|NUP133|ZFAT|CRB2	-0.563216	0	2	0	0	-4.51962	5.15978
1	-4.09551	GO:0048568	M1	1	0	GO Biological Processes	19	embryonic organ development	-4.09551	3.21133	4.8486	24155	429	263	15	5.70342	1.43001	100|2778|3481|5155|5754|6664|6722|7477|7855|9742|26005|28514|51176|57623|286204	ADA|GNAS|IGF2|PDGFB|PTK7|SOX11|SRF|WNT7B|FZD5|IFT140|C2CD3|DLL1|LEF1|ZFAT|CRB2	-0.563216	0	2	0	0	-4.51962	5.15978
1	-2.53659	GO:0061053	M1	1	0	GO Biological Processes	19	somite development	-2.53659	5.15978	4.12486	24155	89	263	5	1.90114	0.842095	6664|28514|51176|55746|286204	SOX11|DLL1|LEF1|NUP133|CRB2	-0.118219	0	2	0	0	-4.51962	5.15978
1	-2.43706	GO:0060485	M1	1	0	GO Biological Processes	19	mesenchyme development	-2.43706	2.96271	3.45959	24155	279	263	9	3.42205	1.121	58|70|5754|6664|9037|51176|55223|55746|286204	ACTA1|ACTC1|PTK7|SOX11|SEMA5A|LEF1|TRIM62|NUP133|CRB2	-0.101786	0	2	0	0	-4.51962	5.15978
1	-2.3475	GO:0048562	M1	1	0	GO Biological Processes	19	embryonic organ morphogenesis	-2.3475	2.87013	3.34977	24155	288	263	9	3.42205	1.121	2778|5754|6664|6722|7855|9742|26005|28514|286204	GNAS|PTK7|SOX11|SRF|FZD5|IFT140|C2CD3|DLL1|CRB2	-0.0771549	0	2	0	0	-4.51962	5.15978
1	-2.28287	GO:0048598	M1	1	0	GO Biological Processes	19	embryonic morphogenesis	-2.28287	2.19423	3.07052	24155	586	263	14	5.32319	1.3843	2778|3481|5754|6664|6722|7477|7704|7855|8915|9742|26005|28514|51176|286204	GNAS|IGF2|PTK7|SOX11|SRF|WNT7B|ZBTB16|FZD5|BCL10|IFT140|C2CD3|DLL1|LEF1|CRB2	-0.0710252	0	2	0	0	-4.51962	5.15978
1	-2.08142	GO:0021915	M1	1	0	GO Biological Processes	19	neural tube development	-2.08142	3.44415	3.25443	24155	160	263	6	2.28137	0.92068	5754|6664|8915|9742|26005|55746	PTK7|SOX11|BCL10|IFT140|C2CD3|NUP133	-0.0551432	0	2	0	0	-4.51962	5.15978
1	-4.27074	GO:0032259	M1	1	0	GO Biological Processes	19	methylation	-4.27074	3.51316	5.08299	24155	366	263	14	5.32319	1.3843	2778|4837|5290|8468|11091|22976|51605|55693|55695|56950|80854|84190|151194|196541	GNAS|NNMT|PIK3CA|FKBP6|WDR5|PAXIP1|TRMT6|KDM4D|NSUN5|SMYD2|SETD7|METTL25|METTL21A|METTL21C	-0.563216	0	3	1	1	-4.27074	4.98379
1	-3.79945	GO:0043414	M1	1	0	GO Biological Processes	19	macromolecule methylation	-3.79945	3.56676	4.76434	24155	309	263	12	4.56274	1.28675	2778|5290|8468|11091|22976|51605|55693|55695|56950|80854|151194|196541	GNAS|PIK3CA|FKBP6|WDR5|PAXIP1|TRMT6|KDM4D|NSUN5|SMYD2|SETD7|METTL21A|METTL21C	-0.546297	0	3	0	0	-4.27074	4.98379
1	-3.31965	GO:0018205	M1	1	0	GO Biological Processes	19	peptidyl-lysine modification	-3.31965	2.98493	4.19995	24155	400	263	13	4.94297	1.33662	5905|5977|8021|11091|22976|51176|55689|55693|55746|56950|80854|151194|196541	RANGAP1|DPF2|NUP214|WDR5|PAXIP1|LEF1|YEATS2|KDM4D|NUP133|SMYD2|SETD7|METTL21A|METTL21C	-0.417078	0	3	0	0	-4.27074	4.98379
1	-3.26625	GO:0018022	M1	1	0	GO Biological Processes	19	peptidyl-lysine methylation	-3.26625	4.98379	4.75989	24155	129	263	7	2.6616	0.992511	11091|22976|55693|56950|80854|151194|196541	WDR5|PAXIP1|KDM4D|SMYD2|SETD7|METTL21A|METTL21C	-0.411111	0	3	0	0	-4.27074	4.98379
1	-2.44847	GO:0006479	M1	1	0	GO Biological Processes	19	protein methylation	-2.44847	3.59167	3.65144	24155	179	263	7	2.6616	0.992511	11091|22976|55693|56950|80854|151194|196541	WDR5|PAXIP1|KDM4D|SMYD2|SETD7|METTL21A|METTL21C	-0.104061	0	3	0	0	-4.27074	4.98379
1	-2.44847	GO:0008213	M1	1	0	GO Biological Processes	19	protein alkylation	-2.44847	3.59167	3.65144	24155	179	263	7	2.6616	0.992511	11091|22976|55693|56950|80854|151194|196541	WDR5|PAXIP1|KDM4D|SMYD2|SETD7|METTL21A|METTL21C	-0.104061	0	3	0	0	-4.27074	4.98379
1	-2.08276	GO:0034968	M1	1	0	GO Biological Processes	19	histone lysine methylation	-2.08276	4.02825	3.40028	24155	114	263	5	1.90114	0.842095	11091|22976|55693|56950|80854	WDR5|PAXIP1|KDM4D|SMYD2|SETD7	-0.0551432	0	3	0	0	-4.27074	4.98379
1	-4.23648	GO:0060261	M1	1	0	GO Biological Processes	19	positive regulation of transcription initiation from RNA polymerase II promoter	-4.23648	18.3688	8.15282	24155	20	263	4	1.52091	0.754651	1385|2099|6722|22976	CREB1|ESR1|SRF|PAXIP1	-0.563216	0	4	1	1	-4.23648	18.3688
1	-3.70352	GO:2000144	M1	1	0	GO Biological Processes	19	positive regulation of DNA-templated transcription, initiation	-3.70352	13.6065	6.87643	24155	27	263	4	1.52091	0.754651	1385|2099|6722|22976	CREB1|ESR1|SRF|PAXIP1	-0.546297	0	4	0	0	-4.23648	18.3688
1	-3.64029	GO:0060260	M1	1	0	GO Biological Processes	19	regulation of transcription initiation from RNA polymerase II promoter	-3.64029	13.1206	6.73282	24155	28	263	4	1.52091	0.754651	1385|2099|6722|22976	CREB1|ESR1|SRF|PAXIP1	-0.52687	0	4	0	0	-4.23648	18.3688
1	-3.16503	GO:2000142	M1	1	0	GO Biological Processes	19	regulation of DNA-templated transcription, initiation	-3.16503	9.92909	5.70274	24155	37	263	4	1.52091	0.754651	1385|2099|6722|22976	CREB1|ESR1|SRF|PAXIP1	-0.372033	0	4	0	0	-4.23648	18.3688
1	-2.83331	M199	M1	1	0	Canonical Pathways	11	PID P38 MK2 PATHWAY	-2.83331	13.1206	5.82995	24155	21	263	3	1.14068	0.654808	1385|4046|6722	CREB1|LSP1|SRF	-0.205966	0	4	0	0	-4.23648	18.3688
1	-2.77051	M87	M1	1	0	Canonical Pathways	11	PID LKB1 PATHWAY	-2.77051	7.81652	4.90769	24155	47	263	4	1.52091	0.754651	1385|2099|2118|51719	CREB1|ESR1|ETV4|CAB39	-0.177241	0	4	0	0	-4.23648	18.3688
1	-2.22536	M270	M1	1	0	Canonical Pathways	11	PID MAPK TRK PATHWAY	-2.22536	8.10389	4.34895	24155	34	263	3	1.14068	0.654808	1385|4908|6722	CREB1|NTF3|SRF	-0.0710252	0	4	0	0	-4.23648	18.3688
1	-2.22536	M30	M1	1	0	Canonical Pathways	11	PID HDAC CLASSII PATHWAY	-2.22536	8.10389	4.34895	24155	34	263	3	1.14068	0.654808	2099|5905|6722	ESR1|RANGAP1|SRF	-0.0710252	0	4	0	0	-4.23648	18.3688
1	-2.14395	M167	M1	1	0	Canonical Pathways	11	PID AP1 PATHWAY	-2.14395	5.24823	3.73448	24155	70	263	4	1.52091	0.754651	58|1385|1843|2099	ACTA1|CREB1|DUSP1|ESR1	-0.0652283	0	4	0	0	-4.23648	18.3688
1	-2.12232	M12012	M1	1	0	Canonical Pathways	11	ST P38 MAPK PATHWAY	-2.12232	7.44682	4.11739	24155	37	263	3	1.14068	0.654808	1385|1843|6722	CREB1|DUSP1|SRF	-0.0652283	0	4	0	0	-4.23648	18.3688
1	-2.03668	GO:0007613	M1	1	0	GO Biological Processes	19	memory	-2.03668	3.92496	3.32744	24155	117	263	5	1.90114	0.842095	1268|1385|4835|4908|6722	CNR1|CREB1|NQO2|NTF3|SRF	-0.0392873	0	4	0	0	-4.23648	18.3688
1	-4.03566	GO:1903530	M1	1	0	GO Biological Processes	19	regulation of secretion by cell	-4.03566	2.54786	4.53978	24155	757	263	21	7.98479	1.67141	1149|1268|1385|1992|2778|3033|3814|5047|5217|6664|6711|7855|8938|9066|11132|27236|55612|83452|83786|90550|140730	CIDEA|CNR1|CREB1|SERPINB1|GNAS|HADH|KISS1|PAEP|PFN2|SOX11|SPTBN1|FZD5|BAIAP3|SYT7|CAPN10|ARFIP1|FERMT1|RAB33B|FRMD8|MCU|RIMS4	-0.563216	0	5	1	1	-4.03566	4.2066
1	-3.36121	GO:0002791	M1	1	0	GO Biological Processes	19	regulation of peptide secretion	-3.36121	2.74435	4.14369	24155	502	263	15	5.70342	1.43001	1149|1268|1992|3033|3814|5047|6711|7855|8938|9066|11132|27236|55612|83786|90550	CIDEA|CNR1|SERPINB1|HADH|KISS1|PAEP|SPTBN1|FZD5|BAIAP3|SYT7|CAPN10|ARFIP1|FERMT1|FRMD8|MCU	-0.417078	0	5	0	0	-4.03566	4.2066
1	-3.34989	GO:0090087	M1	1	0	GO Biological Processes	19	regulation of peptide transport	-3.34989	2.38719	3.99587	24155	731	263	19	7.22433	1.59639	1149|1268|1992|3033|3814|5047|5296|5905|6711|7855|8938|9066|10434|11132|11142|27236|55612|83786|90550	CIDEA|CNR1|SERPINB1|HADH|KISS1|PAEP|PIK3R2|RANGAP1|SPTBN1|FZD5|BAIAP3|SYT7|LYPLA1|CAPN10|PKIG|ARFIP1|FERMT1|FRMD8|MCU	-0.417078	0	5	0	0	-4.03566	4.2066
1	-3.31965	GO:1903532	M1	1	0	GO Biological Processes	19	positive regulation of secretion by cell	-3.31965	2.98493	4.19995	24155	400	263	13	4.94297	1.33662	1268|1385|3814|5047|6664|6711|7855|8938|9066|11132|55612|83786|90550	CNR1|CREB1|KISS1|PAEP|SOX11|SPTBN1|FZD5|BAIAP3|SYT7|CAPN10|FERMT1|FRMD8|MCU	-0.417078	0	5	0	0	-4.03566	4.2066
1	-3.22926	GO:0070201	M1	1	0	GO Biological Processes	19	regulation of establishment of protein localization	-3.22926	2.33294	3.88539	24155	748	263	19	7.22433	1.59639	1149|1268|1992|3033|5047|5296|5905|6711|7855|8938|9066|10434|11132|11142|11156|27236|55612|83786|90550	CIDEA|CNR1|SERPINB1|HADH|PAEP|PIK3R2|RANGAP1|SPTBN1|FZD5|BAIAP3|SYT7|LYPLA1|CAPN10|PKIG|PTP4A3|ARFIP1|FERMT1|FRMD8|MCU	-0.388836	0	5	0	0	-4.03566	4.2066
1	-3.14019	GO:0051223	M1	1	0	GO Biological Processes	19	regulation of protein transport	-3.14019	2.35834	3.82917	24155	701	263	18	6.84411	1.55699	1149|1268|1992|3033|5047|5296|5905|6711|7855|8938|9066|10434|11132|11142|27236|55612|83786|90550	CIDEA|CNR1|SERPINB1|HADH|PAEP|PIK3R2|RANGAP1|SPTBN1|FZD5|BAIAP3|SYT7|LYPLA1|CAPN10|PKIG|ARFIP1|FERMT1|FRMD8|MCU	-0.372033	0	5	0	0	-4.03566	4.2066
1	-3.1238	GO:0050708	M1	1	0	GO Biological Processes	19	regulation of protein secretion	-3.1238	2.7127	3.95108	24155	474	263	14	5.32319	1.3843	1149|1268|1992|3033|5047|6711|7855|8938|9066|11132|27236|55612|83786|90550	CIDEA|CNR1|SERPINB1|HADH|PAEP|SPTBN1|FZD5|BAIAP3|SYT7|CAPN10|ARFIP1|FERMT1|FRMD8|MCU	-0.372033	0	5	0	0	-4.03566	4.2066
1	-3.10979	GO:0046883	M1	1	0	GO Biological Processes	19	regulation of hormone secretion	-3.10979	3.41428	4.17771	24155	269	263	10	3.80228	1.17931	1268|1385|2778|3033|3814|6664|8938|9066|11132|90550	CNR1|CREB1|GNAS|HADH|KISS1|SOX11|BAIAP3|SYT7|CAPN10|MCU	-0.372033	0	5	0	0	-4.03566	4.2066
1	-3.039	GO:0051047	M1	1	0	GO Biological Processes	19	positive regulation of secretion	-3.039	2.78315	3.90977	24155	429	263	13	4.94297	1.33662	1268|1385|3814|5047|6664|6711|7855|8938|9066|11132|55612|83786|90550	CNR1|CREB1|KISS1|PAEP|SOX11|SPTBN1|FZD5|BAIAP3|SYT7|CAPN10|FERMT1|FRMD8|MCU	-0.323515	0	5	0	0	-4.03566	4.2066
1	-2.6012	GO:0046879	M1	1	0	GO Biological Processes	19	hormone secretion	-2.6012	2.91569	3.59065	24155	315	263	10	3.80228	1.17931	1268|1385|2778|3033|3814|6664|8938|9066|11132|90550	CNR1|CREB1|GNAS|HADH|KISS1|SOX11|BAIAP3|SYT7|CAPN10|MCU	-0.12251	0	5	0	0	-4.03566	4.2066
1	-2.50426	GO:0009914	M1	1	0	GO Biological Processes	19	hormone transport	-2.50426	2.82597	3.47712	24155	325	263	10	3.80228	1.17931	1268|1385|2778|3033|3814|6664|8938|9066|11132|90550	CNR1|CREB1|GNAS|HADH|KISS1|SOX11|BAIAP3|SYT7|CAPN10|MCU	-0.118219	0	5	0	0	-4.03566	4.2066
1	-2.49929	GO:0046887	M1	1	0	GO Biological Processes	19	positive regulation of hormone secretion	-2.49929	4.2066	3.86104	24155	131	263	6	2.28137	0.92068	1385|3814|6664|8938|11132|90550	CREB1|KISS1|SOX11|BAIAP3|CAPN10|MCU	-0.118219	0	5	0	0	-4.03566	4.2066
1	-2.42153	GO:0002790	M1	1	0	GO Biological Processes	19	peptide secretion	-2.42153	2.20074	3.19359	24155	626	263	15	5.70342	1.43001	1149|1268|1992|3033|3814|5047|6711|7855|8938|9066|11132|27236|55612|83786|90550	CIDEA|CNR1|SERPINB1|HADH|KISS1|PAEP|SPTBN1|FZD5|BAIAP3|SYT7|CAPN10|ARFIP1|FERMT1|FRMD8|MCU	-0.0974422	0	5	0	0	-4.03566	4.2066
1	-2.33779	GO:0002793	M1	1	0	GO Biological Processes	19	positive regulation of peptide secretion	-2.33779	2.8602	3.33783	24155	289	263	9	3.42205	1.121	3814|5047|6711|7855|8938|11132|55612|83786|90550	KISS1|PAEP|SPTBN1|FZD5|BAIAP3|CAPN10|FERMT1|FRMD8|MCU	-0.0771549	0	5	0	0	-4.03566	4.2066
1	-2.28177	GO:0023061	M1	1	0	GO Biological Processes	19	signal release	-2.28177	2.37017	3.13015	24155	465	263	12	4.56274	1.28675	1268|1385|2778|3033|3814|5217|6664|8938|9066|11132|90550|140730	CNR1|CREB1|GNAS|HADH|KISS1|PFN2|SOX11|BAIAP3|SYT7|CAPN10|MCU|RIMS4	-0.0710252	0	5	0	0	-4.03566	4.2066
1	-2.23883	GO:0009306	M1	1	0	GO Biological Processes	19	protein secretion	-2.23883	2.16833	3.02226	24155	593	263	14	5.32319	1.3843	1149|1268|1992|3033|5047|6711|7855|8938|9066|11132|27236|55612|83786|90550	CIDEA|CNR1|SERPINB1|HADH|PAEP|SPTBN1|FZD5|BAIAP3|SYT7|CAPN10|ARFIP1|FERMT1|FRMD8|MCU	-0.0710252	0	5	0	0	-4.03566	4.2066
1	-2.09905	GO:0090276	M1	1	0	GO Biological Processes	19	regulation of peptide hormone secretion	-2.09905	3.09091	3.17751	24155	208	263	7	2.6616	0.992511	1268|3033|3814|8938|9066|11132|90550	CNR1|HADH|KISS1|BAIAP3|SYT7|CAPN10|MCU	-0.0625427	0	5	0	0	-4.03566	4.2066
1	-2.06667	GO:0050707	M1	1	0	GO Biological Processes	19	regulation of cytokine secretion	-2.06667	3.04696	3.13328	24155	211	263	7	2.6616	0.992511	1149|1992|5047|6711|7855|55612|83786	CIDEA|SERPINB1|PAEP|SPTBN1|FZD5|FERMT1|FRMD8	-0.0531264	0	5	0	0	-4.03566	4.2066
1	-2.01871	GO:0050714	M1	1	0	GO Biological Processes	19	positive regulation of protein secretion	-2.01871	2.73142	2.99608	24155	269	263	8	3.04183	1.05896	5047|6711|7855|8938|11132|55612|83786|90550	PAEP|SPTBN1|FZD5|BAIAP3|CAPN10|FERMT1|FRMD8|MCU	-0.0254497	0	5	0	0	-4.03566	4.2066
1	-3.91874	GO:1990542	M1	1	0	GO Biological Processes	19	mitochondrial transmembrane transport	-3.91874	6.36543	5.66915	24155	101	263	7	2.6616	0.992511	539|5565|7351|7352|10367|10939|90550	ATP5PO|PRKAB2|UCP2|UCP3|MICU1|AFG3L2|MCU	-0.546297	0	6	1	1	-3.91874	25.0484
1	-3.7047	GO:0036444	M1	1	0	GO Biological Processes	19	calcium import into the mitochondrion	-3.7047	25.0484	8.36997	24155	11	263	3	1.14068	0.654808	10367|10939|90550	MICU1|AFG3L2|MCU	-0.546297	0	6	0	0	-3.91874	25.0484
1	-3.27548	GO:0006839	M1	1	0	GO Biological Processes	19	mitochondrial transport	-3.27548	3.58766	4.367	24155	256	263	10	3.80228	1.17931	539|5565|7351|7352|7855|8326|10367|10939|23456|90550	ATP5PO|PRKAB2|UCP2|UCP3|FZD5|FZD9|MICU1|AFG3L2|ABCB10|MCU	-0.411111	0	6	0	0	-3.91874	25.0484
1	-3.19151	R-HSA-8949664	M1	1	0	Reactome Gene Sets	6	Processing of SMDT1	-3.19151	17.2208	6.80954	24155	16	263	3	1.14068	0.654808	10367|10939|90550	MICU1|AFG3L2|MCU	-0.379002	0	6	0	0	-3.91874	25.0484
1	-2.7395	GO:0070509	M1	1	0	GO Biological Processes	19	calcium ion import	-2.7395	5.74026	4.45564	24155	80	263	5	1.90114	0.842095	779|5155|10367|10939|90550	CACNA1S|PDGFB|MICU1|AFG3L2|MCU	-0.154349	0	6	0	0	-3.91874	25.0484
1	-2.71592	R-HSA-8949215	M1	1	0	Reactome Gene Sets	6	Mitochondrial calcium ion transport	-2.71592	11.9797	5.52717	24155	23	263	3	1.14068	0.654808	10367|10939|90550	MICU1|AFG3L2|MCU	-0.154252	0	6	0	0	-3.91874	25.0484
1	-2.60937	GO:0006851	M1	1	0	GO Biological Processes	19	mitochondrial calcium ion transmembrane transport	-2.60937	11.0213	5.2597	24155	25	263	3	1.14068	0.654808	10367|10939|90550	MICU1|AFG3L2|MCU	-0.12251	0	6	0	0	-3.91874	25.0484
1	-2.60937	GO:0051560	M1	1	0	GO Biological Processes	19	mitochondrial calcium ion homeostasis	-2.60937	11.0213	5.2597	24155	25	263	3	1.14068	0.654808	10367|10939|90550	MICU1|AFG3L2|MCU	-0.12251	0	6	0	0	-3.91874	25.0484
1	-2.6012	GO:0070588	M1	1	0	GO Biological Processes	19	calcium ion transmembrane transport	-2.6012	2.91569	3.59065	24155	315	263	10	3.80228	1.17931	779|2859|6769|7070|10008|10343|10367|10939|90550|196541	CACNA1S|GPR35|STAC|THY1|KCNE3|PKDREJ|MICU1|AFG3L2|MCU|METTL21C	-0.12251	0	6	0	0	-3.91874	25.0484
1	-2.51833	GO:0006816	M1	1	0	GO Biological Processes	19	calcium ion transport	-2.51833	2.53947	3.39543	24155	434	263	12	4.56274	1.28675	779|2859|5155|6769|7070|10008|10316|10343|10367|10939|90550|196541	CACNA1S|GPR35|PDGFB|STAC|THY1|KCNE3|NMUR1|PKDREJ|MICU1|AFG3L2|MCU|METTL21C	-0.118219	0	6	0	0	-3.91874	25.0484
1	-2.41935	GO:0098662	M1	1	0	GO Biological Processes	19	inorganic cation transmembrane transport	-2.41935	2.07626	3.14585	24155	752	263	17	6.46388	1.51621	539|779|1804|2859|3780|6769|7070|7351|7352|10008|10242|10343|10367|10939|51719|90550|196541	ATP5PO|CACNA1S|DPP6|GPR35|KCNN1|STAC|THY1|UCP2|UCP3|KCNE3|KCNMB2|PKDREJ|MICU1|AFG3L2|CAB39|MCU|METTL21C	-0.0974422	0	6	0	0	-3.91874	25.0484
1	-2.15539	GO:0070838	M1	1	0	GO Biological Processes	19	divalent metal ion transport	-2.15539	2.28184	2.98563	24155	483	263	12	4.56274	1.28675	779|2859|5155|6769|7070|10008|10316|10343|10367|10939|90550|196541	CACNA1S|GPR35|PDGFB|STAC|THY1|KCNE3|NMUR1|PKDREJ|MICU1|AFG3L2|MCU|METTL21C	-0.0652283	0	6	0	0	-3.91874	25.0484
1	-2.11491	GO:0072511	M1	1	0	GO Biological Processes	19	divalent inorganic cation transport	-2.11491	2.25384	2.93888	24155	489	263	12	4.56274	1.28675	779|2859|5155|6769|7070|10008|10316|10343|10367|10939|90550|196541	CACNA1S|GPR35|PDGFB|STAC|THY1|KCNE3|NMUR1|PKDREJ|MICU1|AFG3L2|MCU|METTL21C	-0.0652283	0	6	0	0	-3.91874	25.0484
1	-3.81307	M164	M1	1	0	Canonical Pathways	11	PID ERBB1 DOWNSTREAM PATHWAY	-3.81307	6.12294	5.51954	24155	105	263	7	2.6616	0.992511	1385|1843|5290|5296|5337|6722|7410	CREB1|DUSP1|PIK3CA|PIK3R2|PLD1|SRF|VAV2	-0.546297	0	7	1	1	-3.81307	14.5017
1	-3.26625	M186	M1	1	0	Canonical Pathways	11	PID PDGFRB PATHWAY	-3.26625	4.98379	4.75989	24155	129	263	7	2.6616	0.992511	867|5155|5290|5296|5867|6722|7410	CBL|PDGFB|PIK3CA|PIK3R2|RAB4A|SRF|VAV2	-0.411111	0	7	0	0	-3.81307	14.5017
1	-3.15442	GO:0090407	M1	1	0	GO Biological Processes	19	organophosphate biosynthetic process	-3.15442	2.36508	3.84253	24155	699	263	18	6.84411	1.55699	100|204|539|2170|4837|5155|5290|5296|5337|5867|8021|10135|55224|55746|65258|166929|221937|283209	ADA|AK2|ATP5PO|FABP3|NNMT|PDGFB|PIK3CA|PIK3R2|PLD1|RAB4A|NUP214|NAMPT|ETNK2|NUP133|MPPE1|SGMS2|FOXK1|PGM2L1	-0.372033	0	7	0	0	-3.81307	14.5017
1	-2.99419	M214	M1	1	0	Canonical Pathways	11	PID ERBB1 INTERNALIZATION PATHWAY	-2.99419	8.9604	5.35227	24155	41	263	4	1.52091	0.754651	867|5290|5296|7322	CBL|PIK3CA|PIK3R2|UBE2D2	-0.289429	0	7	0	0	-3.81307	14.5017
1	-2.96386	M273	M1	1	0	Canonical Pathways	11	PID EPHA2 FWD PATHWAY	-2.96386	14.5017	6.17702	24155	19	263	3	1.14068	0.654808	867|5290|7410	CBL|PIK3CA|VAV2	-0.279786	0	7	0	0	-3.81307	14.5017
1	-2.91571	M91	M1	1	0	Canonical Pathways	11	PID TCPTP PATHWAY	-2.91571	8.54364	5.19451	24155	43	263	4	1.52091	0.754651	5155|5290|5296|5867	PDGFB|PIK3CA|PIK3R2|RAB4A	-0.250428	0	7	0	0	-3.81307	14.5017
1	-2.81325	R-HSA-9009391	M1	1	0	Reactome Gene Sets	6	Extra-nuclear estrogen signaling	-2.81325	5.9639	4.57725	24155	77	263	5	1.90114	0.842095	1385|2099|5290|5296|6722	CREB1|ESR1|PIK3CA|PIK3R2|SRF	-0.194675	0	7	0	0	-3.81307	14.5017
1	-2.77313	R-HSA-912631	M1	1	0	Reactome Gene Sets	6	Regulation of signaling by CBL	-2.77313	12.5242	5.67365	24155	22	263	3	1.14068	0.654808	867|5290|5296	CBL|PIK3CA|PIK3R2	-0.177241	0	7	0	0	-3.81307	14.5017
1	-2.71592	R-HSA-373753	M1	1	0	Reactome Gene Sets	6	Nephrin family interactions	-2.71592	11.9797	5.52717	24155	23	263	3	1.14068	0.654808	5290|5296|6711	PIK3CA|PIK3R2|SPTBN1	-0.154252	0	7	0	0	-3.81307	14.5017
1	-2.64011	GO:0008654	M1	1	0	GO Biological Processes	19	phospholipid biosynthetic process	-2.64011	3.17922	3.70664	24155	260	263	9	3.42205	1.121	2170|5155|5290|5296|5337|5867|55224|65258|166929	FABP3|PDGFB|PIK3CA|PIK3R2|PLD1|RAB4A|ETNK2|MPPE1|SGMS2	-0.12251	0	7	0	0	-3.81307	14.5017
1	-2.60937	R-HSA-2029485	M1	1	0	Reactome Gene Sets	6	Role of phospholipids in phagocytosis	-2.60937	11.0213	5.2597	24155	25	263	3	1.14068	0.654808	5290|5296|5337	PIK3CA|PIK3R2|PLD1	-0.12251	0	7	0	0	-3.81307	14.5017
1	-2.57949	hsa05215	M1	1	0	KEGG Pathway	24	Prostate cancer	-2.57949	5.2784	4.19437	24155	87	263	5	1.90114	0.842095	1385|5155|5290|5296|51176	CREB1|PDGFB|PIK3CA|PIK3R2|LEF1	-0.118219	0	7	0	0	-3.81307	14.5017
1	-2.57731	R-HSA-1660499	M1	1	0	Reactome Gene Sets	6	Synthesis of PIPs at the plasma membrane	-2.57731	6.93163	4.53557	24155	53	263	4	1.52091	0.754651	5290|5296|5867|22874	PIK3CA|PIK3R2|RAB4A|PLEKHA6	-0.118219	0	7	0	0	-3.81307	14.5017
1	-2.56856	GO:0046474	M1	1	0	GO Biological Processes	19	glycerophospholipid biosynthetic process	-2.56856	3.38596	3.7042	24155	217	263	8	3.04183	1.05896	2170|5155|5290|5296|5337|5867|55224|65258	FABP3|PDGFB|PIK3CA|PIK3R2|PLD1|RAB4A|ETNK2|MPPE1	-0.118219	0	7	0	0	-3.81307	14.5017
1	-2.53659	hsa04211	M1	1	0	KEGG Pathway	24	Longevity regulating pathway	-2.53659	5.15978	4.12486	24155	89	263	5	1.90114	0.842095	1385|5290|5296|5565|143686	CREB1|PIK3CA|PIK3R2|PRKAB2|SESN3	-0.118219	0	7	0	0	-3.81307	14.5017
1	-2.51845	hsa05221	M1	1	0	KEGG Pathway	24	Acute myeloid leukemia	-2.51845	6.67957	4.4242	24155	55	263	4	1.52091	0.754651	5290|5296|7704|51176	PIK3CA|PIK3R2|ZBTB16|LEF1	-0.118219	0	7	0	0	-3.81307	14.5017
1	-2.42224	R-HSA-186763	M1	1	0	Reactome Gene Sets	6	Downstream signal transduction	-2.42224	9.50111	4.80594	24155	29	263	3	1.14068	0.654808	5155|5290|5296	PDGFB|PIK3CA|PIK3R2	-0.0974422	0	7	0	0	-3.81307	14.5017
1	-2.39511	hsa01522	M1	1	0	KEGG Pathway	24	Endocrine resistance	-2.39511	4.78355	3.89711	24155	96	263	5	1.90114	0.842095	2099|2778|5290|5296|28514	ESR1|GNAS|PIK3CA|PIK3R2|DLL1	-0.0904036	0	7	0	0	-3.81307	14.5017
1	-2.37996	M72	M1	1	0	Canonical Pathways	11	PID NECTIN PATHWAY	-2.37996	9.18441	4.70609	24155	30	263	3	1.14068	0.654808	5155|5290|7410	PDGFB|PIK3CA|VAV2	-0.0898276	0	7	0	0	-3.81307	14.5017
1	-2.37996	R-HSA-2424491	M1	1	0	Reactome Gene Sets	6	DAP12 signaling	-2.37996	9.18441	4.70609	24155	30	263	3	1.14068	0.654808	5290|5296|7410	PIK3CA|PIK3R2|VAV2	-0.0898276	0	7	0	0	-3.81307	14.5017
1	-2.35697	hsa04915	M1	1	0	KEGG Pathway	24	Estrogen signaling pathway	-2.35697	4.68592	3.83605	24155	98	263	5	1.90114	0.842095	1385|2099|2778|5290|5296	CREB1|ESR1|GNAS|PIK3CA|PIK3R2	-0.0771549	0	7	0	0	-3.81307	14.5017
1	-2.33826	hsa05231	M1	1	0	KEGG Pathway	24	Choline metabolism in cancer	-2.33826	4.63859	3.80614	24155	99	263	5	1.90114	0.842095	5155|5290|5296|5337|10434	PDGFB|PIK3CA|PIK3R2|PLD1|LYPLA1	-0.0771549	0	7	0	0	-3.81307	14.5017
1	-2.30152	R-HSA-2219528	M1	1	0	Reactome Gene Sets	6	PI3K/AKT Signaling in Cancer	-2.30152	4.54674	3.74751	24155	101	263	5	1.90114	0.842095	1385|2099|5155|5290|5296	CREB1|ESR1|PDGFB|PIK3CA|PIK3R2	-0.0710252	0	7	0	0	-3.81307	14.5017
1	-2.26566	hsa04660	M1	1	0	KEGG Pathway	24	T cell receptor signaling pathway	-2.26566	4.45845	3.69038	24155	103	263	5	1.90114	0.842095	867|5290|5296|7410|8915	CBL|PIK3CA|PIK3R2|VAV2|BCL10	-0.0710252	0	7	0	0	-3.81307	14.5017
1	-2.21175	hsa04024	M1	1	0	KEGG Pathway	24	cAMP signaling pathway	-2.21175	3.24701	3.33095	24155	198	263	7	2.6616	0.992511	779|1385|2778|5290|5296|5337|7410	CACNA1S|CREB1|GNAS|PIK3CA|PIK3R2|PLD1|VAV2	-0.0710252	0	7	0	0	-3.81307	14.5017
1	-2.19646	hsa04931	M1	1	0	KEGG Pathway	24	Insulin resistance	-2.19646	4.29178	3.58038	24155	107	263	5	1.90114	0.842095	1385|5290|5296|5565|79660	CREB1|PIK3CA|PIK3R2|PRKAB2|PPP1R3B	-0.0710252	0	7	0	0	-3.81307	14.5017
1	-2.19097	GO:0045017	M1	1	0	GO Biological Processes	19	glycerolipid biosynthetic process	-2.19097	2.9273	3.22031	24155	251	263	8	3.04183	1.05896	2170|5155|5290|5296|5337|5867|55224|65258	FABP3|PDGFB|PIK3CA|PIK3R2|PLD1|RAB4A|ETNK2|MPPE1	-0.0710252	0	7	0	0	-3.81307	14.5017
1	-2.18991	R-HSA-114604	M1	1	0	Reactome Gene Sets	6	GPVI-mediated activation cascade	-2.18991	7.87235	4.26871	24155	35	263	3	1.14068	0.654808	5290|5296|7410	PIK3CA|PIK3R2|VAV2	-0.0710252	0	7	0	0	-3.81307	14.5017
1	-2.14395	M81	M1	1	0	Canonical Pathways	11	PID CDC42 PATHWAY	-2.14395	5.24823	3.73448	24155	70	263	4	1.52091	0.754651	867|5290|5337|7410	CBL|PIK3CA|PLD1|VAV2	-0.0652283	0	7	0	0	-3.81307	14.5017
1	-2.12242	hsa04662	M1	1	0	KEGG Pathway	24	B cell receptor signaling pathway	-2.12242	5.17432	3.6957	24155	71	263	4	1.52091	0.754651	5290|5296|7410|8915	PIK3CA|PIK3R2|VAV2|BCL10	-0.0652283	0	7	0	0	-3.81307	14.5017
1	-2.09916	GO:0006644	M1	1	0	GO Biological Processes	19	phospholipid metabolic process	-2.09916	2.34405	2.95397	24155	431	263	11	4.18251	1.23442	2170|5155|5290|5296|5337|5867|7410|55224|65258|166929|347735	FABP3|PDGFB|PIK3CA|PIK3R2|PLD1|RAB4A|VAV2|ETNK2|MPPE1|SGMS2|SERINC2	-0.0625427	0	7	0	0	-3.81307	14.5017
1	-2.07739	hsa04015	M1	1	0	KEGG Pathway	24	Rap1 signaling pathway	-2.07739	3.06147	3.14793	24155	210	263	7	2.6616	0.992511	1268|2778|5155|5217|5290|5296|7410	CNR1|GNAS|PDGFB|PFN2|PIK3CA|PIK3R2|VAV2	-0.0543196	0	7	0	0	-3.81307	14.5017
1	-2.06735	GO:0006650	M1	1	0	GO Biological Processes	19	glycerophospholipid metabolic process	-2.06735	2.59121	3.0016	24155	319	263	9	3.42205	1.121	2170|5155|5290|5296|5337|5867|55224|65258|347735	FABP3|PDGFB|PIK3CA|PIK3R2|PLD1|RAB4A|ETNK2|MPPE1|SERINC2	-0.0531264	0	7	0	0	-3.81307	14.5017
1	-2.05187	GO:0006661	M1	1	0	GO Biological Processes	19	phosphatidylinositol biosynthetic process	-2.05187	3.9588	3.35145	24155	116	263	5	1.90114	0.842095	5155|5290|5296|5867|65258	PDGFB|PIK3CA|PIK3R2|RAB4A|MPPE1	-0.050304	0	7	0	0	-3.81307	14.5017
1	-2.03979	R-HSA-2219530	M1	1	0	Reactome Gene Sets	6	Constitutive Signaling by Aberrant PI3K in Cancer	-2.03979	4.89835	3.54756	24155	75	263	4	1.52091	0.754651	2099|5155|5290|5296	ESR1|PDGFB|PIK3CA|PIK3R2	-0.0403142	0	7	0	0	-3.81307	14.5017
1	-3.76945	GO:0060669	M1	1	0	GO Biological Processes	19	embryonic placenta morphogenesis	-3.76945	14.1299	7.02786	24155	26	263	4	1.52091	0.754651	3481|7477|7855|51176	IGF2|WNT7B|FZD5|LEF1	-0.546297	0	8	1	1	-3.76945	14.5017
1	-3.72878	hsa05224	M1	1	0	KEGG Pathway	24	Breast cancer	-3.72878	5.10245	5.18043	24155	144	263	8	3.04183	1.05896	2099|5290|5296|7477|7855|8326|28514|51176	ESR1|PIK3CA|PIK3R2|WNT7B|FZD5|FZD9|DLL1|LEF1	-0.546297	0	8	0	0	-3.76945	14.5017
1	-3.54938	GO:0001890	M1	1	0	GO Biological Processes	19	placenta development	-3.54938	4.80231	4.95011	24155	153	263	8	3.04183	1.05896	100|3481|5155|7477|7855|51176|55224|57623	ADA|IGF2|PDGFB|WNT7B|FZD5|LEF1|ETNK2|ZFAT	-0.462283	0	8	0	0	-3.76945	14.5017
1	-3.39337	hsa05205	M1	1	0	KEGG Pathway	24	Proteoglycans in cancer	-3.39337	4.07191	4.61138	24155	203	263	9	3.42205	1.121	867|2099|3481|5290|5296|7410|7477|7855|8326	CBL|ESR1|IGF2|PIK3CA|PIK3R2|VAV2|WNT7B|FZD5|FZD9	-0.417078	0	8	0	0	-3.76945	14.5017
1	-3.39318	GO:0001892	M1	1	0	GO Biological Processes	19	embryonic placenta development	-3.39318	6.2621	5.18842	24155	88	263	6	2.28137	0.92068	3481|5155|7477|7855|51176|57623	IGF2|PDGFB|WNT7B|FZD5|LEF1|ZFAT	-0.417078	0	8	0	0	-3.76945	14.5017
1	-3.07518	hsa04916	M1	1	0	KEGG Pathway	24	Melanogenesis	-3.07518	5.45609	4.70833	24155	101	263	6	2.28137	0.92068	1385|2778|7477|7855|8326|51176	CREB1|GNAS|WNT7B|FZD5|FZD9|LEF1	-0.348706	0	8	0	0	-3.76945	14.5017
1	-2.96386	GO:0060438	M1	1	0	GO Biological Processes	19	trachea development	-2.96386	14.5017	6.17702	24155	19	263	3	1.14068	0.654808	6722|7477|51176	SRF|WNT7B|LEF1	-0.279786	0	8	0	0	-3.76945	14.5017
1	-2.8644	hsa04150	M1	1	0	KEGG Pathway	24	mTOR signaling pathway	-2.8644	4.25767	4.21309	24155	151	263	7	2.6616	0.992511	5290|5296|7477|7855|8326|9894|51719	PIK3CA|PIK3R2|WNT7B|FZD5|FZD9|TELO2|CAB39	-0.218959	0	8	0	0	-3.76945	14.5017
1	-2.83331	GO:0060713	M1	1	0	GO Biological Processes	19	labyrinthine layer morphogenesis	-2.83331	13.1206	5.82995	24155	21	263	3	1.14068	0.654808	7477|7855|51176	WNT7B|FZD5|LEF1	-0.205966	0	8	0	0	-3.76945	14.5017
1	-2.54357	GO:0001701	M1	1	0	GO Biological Processes	19	in utero embryonic development	-2.54357	2.69409	3.46891	24155	375	263	11	4.18251	1.23442	100|3481|4695|5155|6722|7477|7855|26005|51176|55224|57623	ADA|IGF2|NDUFA2|PDGFB|SRF|WNT7B|FZD5|C2CD3|LEF1|ETNK2|ZFAT	-0.118219	0	8	0	0	-3.76945	14.5017
1	-2.53448	GO:0048608	M1	1	0	GO Biological Processes	19	reproductive structure development	-2.53448	2.55123	3.41333	24155	432	263	12	4.56274	1.28675	100|867|2099|3020|3481|5155|7337|7477|7855|51176|55224|57623	ADA|CBL|ESR1|H3-3A|IGF2|PDGFB|UBE3A|WNT7B|FZD5|LEF1|ETNK2|ZFAT	-0.118219	0	8	0	0	-3.76945	14.5017
1	-2.51845	hsa05217	M1	1	0	KEGG Pathway	24	Basal cell carcinoma	-2.51845	6.67957	4.4242	24155	55	263	4	1.52091	0.754651	7477|7855|8326|51176	WNT7B|FZD5|FZD9|LEF1	-0.118219	0	8	0	0	-3.76945	14.5017
1	-2.5103	GO:0061458	M1	1	0	GO Biological Processes	19	reproductive system development	-2.5103	2.53363	3.38652	24155	435	263	12	4.56274	1.28675	100|867|2099|3020|3481|5155|7337|7477|7855|51176|55224|57623	ADA|CBL|ESR1|H3-3A|IGF2|PDGFB|UBE3A|WNT7B|FZD5|LEF1|ETNK2|ZFAT	-0.118219	0	8	0	0	-3.76945	14.5017
1	-2.46619	M77	M1	1	0	Canonical Pathways	11	PID WNT SIGNALING PATHWAY	-2.46619	9.84044	4.91075	24155	28	263	3	1.14068	0.654808	7477|7855|8326	WNT7B|FZD5|FZD9	-0.107694	0	8	0	0	-3.76945	14.5017
1	-2.37394	hsa05200	M1	1	0	KEGG Pathway	24	Pathways in cancer	-2.37394	2.55768	3.27492	24155	395	263	11	4.18251	1.23442	867|2778|5155|5290|5296|5337|7477|7704|7855|8326|51176	CBL|GNAS|PDGFB|PIK3CA|PIK3R2|PLD1|WNT7B|ZBTB16|FZD5|FZD9|LEF1	-0.0898276	0	8	0	0	-3.76945	14.5017
1	-2.21175	GO:0060541	M1	1	0	GO Biological Processes	19	respiratory system development	-2.21175	3.24701	3.33095	24155	198	263	7	2.6616	0.992511	100|1385|5754|6664|6722|7477|51176	ADA|CREB1|PTK7|SOX11|SRF|WNT7B|LEF1	-0.0710252	0	8	0	0	-3.76945	14.5017
1	-2.14141	hsa05166	M1	1	0	KEGG Pathway	24	HTLV-I infection	-2.14141	2.87013	3.15608	24155	256	263	8	3.04183	1.05896	1385|5155|5290|5296|6722|7477|7855|8326	CREB1|PDGFB|PIK3CA|PIK3R2|SRF|WNT7B|FZD5|FZD9	-0.0652283	0	8	0	0	-3.76945	14.5017
1	-2.11748	GO:0003006	M1	1	0	GO Biological Processes	19	developmental process involved in reproduction	-2.11748	2.03495	2.86569	24155	677	263	15	5.70342	1.43001	100|867|2099|3020|3481|5047|5155|7337|7477|7704|7855|51176|55224|55342|57623	ADA|CBL|ESR1|H3-3A|IGF2|PAEP|PDGFB|UBE3A|WNT7B|ZBTB16|FZD5|LEF1|ETNK2|STRBP|ZFAT	-0.0652283	0	8	0	0	-3.76945	14.5017
1	-3.68775	GO:0035264	M1	1	0	GO Biological Processes	19	multicellular organism growth	-3.68775	5.03255	5.12762	24155	146	263	8	3.04183	1.05896	104|1385|2778|3020|3481|5290|10939|55224	ADARB1|CREB1|GNAS|H3-3A|IGF2|PIK3CA|AFG3L2|ETNK2	-0.546297	0	9	1	1	-3.68775	10.2049
1	-3.33782	GO:0048589	M1	1	0	GO Biological Processes	19	developmental growth	-3.33782	2.45281	4.01353	24155	674	263	18	6.84411	1.55699	104|1385|2099|2778|3020|3481|5290|5754|5802|6722|7337|7477|8326|9037|10939|28514|55224|85301	ADARB1|CREB1|ESR1|GNAS|H3-3A|IGF2|PIK3CA|PTK7|PTPRS|SRF|UBE3A|WNT7B|FZD9|SEMA5A|AFG3L2|DLL1|ETNK2|COL27A1	-0.417078	0	9	0	0	-3.68775	10.2049
1	-2.51193	GO:0071514	M1	1	0	GO Biological Processes	19	genetic imprinting	-2.51193	10.2049	5.02096	24155	27	263	3	1.14068	0.654808	2778|3481|5290	GNAS|IGF2|PIK3CA	-0.118219	0	9	0	0	-3.68775	10.2049
1	-2.23387	GO:0040014	M1	1	0	GO Biological Processes	19	regulation of multicellular organism growth	-2.23387	5.56631	3.89739	24155	66	263	4	1.52091	0.754651	1385|3481|5290|10939	CREB1|IGF2|PIK3CA|AFG3L2	-0.0710252	0	9	0	0	-3.68775	10.2049
1	-2.00962	GO:0045927	M1	1	0	GO Biological Processes	19	positive regulation of growth	-2.00962	2.72131	2.98417	24155	270	263	8	3.04183	1.05896	1385|3020|3481|6722|9037|10591|28514|51176	CREB1|H3-3A|IGF2|SRF|SEMA5A|DNPH1|DLL1|LEF1	-0.0184165	0	9	0	0	-3.68775	10.2049
1	-3.47283	GO:0045759	M1	1	0	GO Biological Processes	19	negative regulation of action potential	-3.47283	21.1948	7.64136	24155	13	263	3	1.14068	0.654808	1268|2859|10008	CNR1|GPR35|KCNE3	-0.417078	0	10	1	1	-3.47283	21.1948
1	-2.18991	GO:1901385	M1	1	0	GO Biological Processes	19	regulation of voltage-gated calcium channel activity	-2.18991	7.87235	4.26871	24155	35	263	3	1.14068	0.654808	2859|6769|10008	GPR35|STAC|KCNE3	-0.0710252	0	10	0	0	-3.47283	21.1948
1	-3.43383	R-HSA-5663202	M1	1	0	Reactome Gene Sets	6	Diseases of signal transduction	-3.43383	3.06934	4.31693	24155	389	263	13	4.94297	1.33662	867|1385|1523|2099|5155|5290|5296|7855|28514|54492|55733|56829|57670	CBL|CREB1|CUX1|ESR1|PDGFB|PIK3CA|PIK3R2|FZD5|DLL1|NEURL1B|HHAT|ZC3HAV1|KIAA1549	-0.417078	0	11	1	1	-3.43383	8.34946
1	-2.26202	R-HSA-1980145	M1	1	0	Reactome Gene Sets	6	Signaling by NOTCH2	-2.26202	8.34946	4.43253	24155	33	263	3	1.14068	0.654808	1385|28514|54492	CREB1|DLL1|NEURL1B	-0.0710252	0	11	0	0	-3.43383	8.34946
1	-3.19139	hsa05146	M1	1	0	KEGG Pathway	24	Amoebiasis	-3.19139	5.74026	4.88253	24155	96	263	6	2.28137	0.92068	1992|2778|5269|5272|5290|5296	SERPINB1|GNAS|SERPINB6|SERPINB9|PIK3CA|PIK3R2	-0.379002	0	12	1	1	-3.19139	5.74026
1	-2.07104	R-HSA-109582	M1	1	0	Reactome Gene Sets	6	Hemostasis	-2.07104	2.07056	2.83566	24155	621	263	14	5.32319	1.3843	547|747|2778|3020|3481|5155|5269|5290|5296|7410|10242|23052|84617|113220	KIF1A|DAGLA|GNAS|H3-3A|IGF2|PDGFB|SERPINB6|PIK3CA|PIK3R2|VAV2|KCNMB2|ENDOD1|TUBB6|KIF12	-0.0531264	0	12	0	0	-3.19139	5.74026
1	-3.11068	R-HSA-9034015	M1	1	0	Reactome Gene Sets	6	Signaling by NTRK3 (TRKC)	-3.11068	16.2078	6.58091	24155	17	263	3	1.14068	0.654808	4908|5290|5802	NTF3|PIK3CA|PTPRS	-0.372033	0	13	1	1	-3.11068	16.2078
1	-2.70311	GO:1990090	M1	1	0	GO Biological Processes	19	cellular response to nerve growth factor stimulus	-2.70311	7.49748	4.77668	24155	49	263	4	1.52091	0.754651	867|1385|4908|7337	CBL|CREB1|NTF3|UBE3A	-0.150297	0	13	0	0	-3.11068	16.2078
1	-2.60771	GO:1990089	M1	1	0	GO Biological Processes	19	response to nerve growth factor	-2.60771	7.06493	4.59344	24155	52	263	4	1.52091	0.754651	867|1385|4908|7337	CBL|CREB1|NTF3|UBE3A	-0.12251	0	13	0	0	-3.11068	16.2078
1	-2.57949	GO:0014068	M1	1	0	GO Biological Processes	19	positive regulation of phosphatidylinositol 3-kinase signaling	-2.57949	5.2784	4.19437	24155	87	263	5	1.90114	0.842095	867|4908|5155|5290|7337	CBL|NTF3|PDGFB|PIK3CA|UBE3A	-0.118219	0	13	0	0	-3.11068	16.2078
1	-2.38305	GO:0048017	M1	1	0	GO Biological Processes	19	inositol lipid-mediated signaling	-2.38305	3.49407	3.56304	24155	184	263	7	2.6616	0.992511	867|4908|5155|5290|5296|5337|7337	CBL|NTF3|PDGFB|PIK3CA|PIK3R2|PLD1|UBE3A	-0.0898276	0	13	0	0	-3.11068	16.2078
1	-2.33826	R-HSA-166520	M1	1	0	Reactome Gene Sets	6	Signaling by NTRKs	-2.33826	4.63859	3.80614	24155	99	263	5	1.90114	0.842095	1385|4908|5290|5296|5802	CREB1|NTF3|PIK3CA|PIK3R2|PTPRS	-0.0771549	0	13	0	0	-3.11068	16.2078
1	-2.2415	GO:0014065	M1	1	0	GO Biological Processes	19	phosphatidylinositol 3-kinase signaling	-2.2415	3.72341	3.48675	24155	148	263	6	2.28137	0.92068	867|4908|5155|5290|5296|7337	CBL|NTF3|PDGFB|PIK3CA|PIK3R2|UBE3A	-0.0710252	0	13	0	0	-3.11068	16.2078
1	-2.23879	R-HSA-9006934	M1	1	0	Reactome Gene Sets	6	Signaling by Receptor Tyrosine Kinases	-2.23879	2.33998	3.08125	24155	471	263	12	4.56274	1.28675	867|1385|2099|3481|4908|5155|5290|5296|5802|5867|7410|85301	CBL|CREB1|ESR1|IGF2|NTF3|PDGFB|PIK3CA|PIK3R2|PTPRS|RAB4A|VAV2|COL27A1	-0.0710252	0	13	0	0	-3.11068	16.2078
1	-2.91476	GO:0061351	M1	1	0	GO Biological Processes	19	neural precursor cell proliferation	-2.91476	4.34398	4.28126	24155	148	263	7	2.6616	0.992511	547|747|2047|8326|9833|51176|57650	KIF1A|DAGLA|EPHB1|FZD9|MELK|LEF1|CIP2A	-0.250428	0	14	1	1	-2.91476	4.59221
1	-2.68969	GO:0072089	M1	1	0	GO Biological Processes	19	stem cell proliferation	-2.68969	4.59221	4.13881	24155	120	263	6	2.28137	0.92068	747|6664|7477|8326|51176|55612	DAGLA|SOX11|WNT7B|FZD9|LEF1|FERMT1	-0.150297	0	14	0	0	-2.91476	4.59221
1	-2.89677	GO:0046823	M1	1	0	GO Biological Processes	19	negative regulation of nucleocytoplasmic transport	-2.89677	13.7766	5.99727	24155	20	263	3	1.14068	0.654808	5905|11142|55612	RANGAP1|PKIG|FERMT1	-0.241985	0	15	1	1	-2.89677	13.7766
1	-2.69114	GO:0051051	M1	1	0	GO Biological Processes	19	negative regulation of transport	-2.69114	2.43988	3.50643	24155	527	263	14	5.32319	1.3843	100|1149|1268|1992|2859|3033|5905|8326|10008|10434|11142|51719|55612|83452	ADA|CIDEA|CNR1|SERPINB1|GPR35|HADH|RANGAP1|FZD9|KCNE3|LYPLA1|PKIG|CAB39|FERMT1|RAB33B	-0.150297	0	15	0	0	-2.89677	13.7766
1	-2.24805	GO:0046822	M1	1	0	GO Biological Processes	19	regulation of nucleocytoplasmic transport	-2.24805	4.41558	3.66236	24155	104	263	5	1.90114	0.842095	5296|5905|8021|11142|55612	PIK3R2|RANGAP1|NUP214|PKIG|FERMT1	-0.0710252	0	15	0	0	-2.89677	13.7766
1	-2.24707	GO:0051224	M1	1	0	GO Biological Processes	19	negative regulation of protein transport	-2.24707	3.29697	3.3789	24155	195	263	7	2.6616	0.992511	1149|1992|3033|5905|10434|11142|55612	CIDEA|SERPINB1|HADH|RANGAP1|LYPLA1|PKIG|FERMT1	-0.0710252	0	15	0	0	-2.89677	13.7766
1	-2.20013	GO:1904950	M1	1	0	GO Biological Processes	19	negative regulation of establishment of protein localization	-2.20013	3.2307	3.31517	24155	199	263	7	2.6616	0.992511	1149|1992|3033|5905|10434|11142|55612	CIDEA|SERPINB1|HADH|RANGAP1|LYPLA1|PKIG|FERMT1	-0.0710252	0	15	0	0	-2.89677	13.7766
1	-2.11434	GO:1903828	M1	1	0	GO Biological Processes	19	negative regulation of cellular protein localization	-2.11434	4.10018	3.45023	24155	112	263	5	1.90114	0.842095	5905|8326|10434|11142|55612	RANGAP1|FZD9|LYPLA1|PKIG|FERMT1	-0.0652283	0	15	0	0	-2.89677	13.7766
1	-2.77051	GO:0042461	M1	1	0	GO Biological Processes	19	photoreceptor cell development	-2.77051	7.81652	4.90769	24155	47	263	4	1.52091	0.754651	7070|9742|83552|157657	THY1|IFT140|MFRP|C8orf37	-0.177241	0	16	1	1	-2.77051	7.81652
1	-2.61114	GO:0043010	M1	1	0	GO Biological Processes	19	camera-type eye development	-2.61114	2.92497	3.60224	24155	314	263	10	3.80228	1.17931	2047|6664|6722|7070|7477|7855|9742|22989|28514|83552	EPHB1|SOX11|SRF|THY1|WNT7B|FZD5|IFT140|MYH15|DLL1|MFRP	-0.12251	0	16	0	0	-2.77051	7.81652
1	-2.30564	GO:0046530	M1	1	0	GO Biological Processes	19	photoreceptor cell differentiation	-2.30564	5.83137	4.02857	24155	63	263	4	1.52091	0.754651	7070|9742|83552|157657	THY1|IFT140|MFRP|C8orf37	-0.0710252	0	16	0	0	-2.77051	7.81652
1	-2.22753	GO:0048592	M1	1	0	GO Biological Processes	19	eye morphogenesis	-2.22753	3.69842	3.46648	24155	149	263	6	2.28137	0.92068	2047|6664|7070|7855|28514|83552	EPHB1|SOX11|THY1|FZD5|DLL1|MFRP	-0.0710252	0	16	0	0	-2.77051	7.81652
1	-2.18011	GO:0001654	M1	1	0	GO Biological Processes	19	eye development	-2.18011	2.53713	3.09162	24155	362	263	10	3.80228	1.17931	2047|6664|6722|7070|7477|7855|9742|22989|28514|83552	EPHB1|SOX11|SRF|THY1|WNT7B|FZD5|IFT140|MYH15|DLL1|MFRP	-0.0666867	0	16	0	0	-2.77051	7.81652
1	-2.148	GO:0150063	M1	1	0	GO Biological Processes	19	visual system development	-2.148	2.5094	3.05284	24155	366	263	10	3.80228	1.17931	2047|6664|6722|7070|7477|7855|9742|22989|28514|83552	EPHB1|SOX11|SRF|THY1|WNT7B|FZD5|IFT140|MYH15|DLL1|MFRP	-0.0652283	0	16	0	0	-2.77051	7.81652
1	-2.12232	GO:0031076	M1	1	0	GO Biological Processes	19	embryonic camera-type eye development	-2.12232	7.44682	4.11739	24155	37	263	3	1.14068	0.654808	6664|7855|9742	SOX11|FZD5|IFT140	-0.0652283	0	16	0	0	-2.77051	7.81652
1	-2.11434	GO:0048593	M1	1	0	GO Biological Processes	19	camera-type eye morphogenesis	-2.11434	4.10018	3.45023	24155	112	263	5	1.90114	0.842095	2047|6664|7070|7855|28514	EPHB1|SOX11|THY1|FZD5|DLL1	-0.0652283	0	16	0	0	-2.77051	7.81652
1	-2.10861	GO:0048880	M1	1	0	GO Biological Processes	19	sensory system development	-2.10861	2.47558	3.00507	24155	371	263	10	3.80228	1.17931	2047|6664|6722|7070|7477|7855|9742|22989|28514|83552	EPHB1|SOX11|SRF|THY1|WNT7B|FZD5|IFT140|MYH15|DLL1|MFRP	-0.0652283	0	16	0	0	-2.77051	7.81652
1	-2.62359	hsa04911	M1	1	0	KEGG Pathway	24	Insulin secretion	-2.62359	5.40259	4.26605	24155	85	263	5	1.90114	0.842095	779|1385|2778|3780|10242	CACNA1S|CREB1|GNAS|KCNN1|KCNMB2	-0.12251	0	17	1	1	-2.62359	5.40259
1	-2.51557	GO:0045778	M1	1	0	GO Biological Processes	19	positive regulation of ossification	-2.51557	5.10245	4.09089	24155	90	263	5	1.90114	0.842095	2778|6664|7477|7704|8326	GNAS|SOX11|WNT7B|ZBTB16|FZD9	-0.118219	0	18	1	1	-2.51557	5.10245
1	-2.46112	GO:0001649	M1	1	0	GO Biological Processes	19	osteoblast differentiation	-2.46112	3.25112	3.56727	24155	226	263	8	3.04183	1.05896	1462|2778|3020|3481|6664|7477|51176|100126315	VCAN|GNAS|H3-3A|IGF2|SOX11|WNT7B|LEF1|MIR665	-0.107365	0	18	0	0	-2.51557	5.10245
1	-2.34155	GO:0001503	M1	1	0	GO Biological Processes	19	ossification	-2.34155	2.53204	3.23755	24155	399	263	11	4.18251	1.23442	1462|2778|3020|3481|6664|7477|7704|8326|51176|645811|100126315	VCAN|GNAS|H3-3A|IGF2|SOX11|WNT7B|ZBTB16|FZD9|LEF1|CCDC154|MIR665	-0.0771549	0	18	0	0	-2.51557	5.10245
1	-2.26982	GO:1902107	M1	1	0	GO Biological Processes	19	positive regulation of leukocyte differentiation	-2.26982	3.77442	3.52782	24155	146	263	6	2.28137	0.92068	100|1385|2778|3594|7704|51176	ADA|CREB1|GNAS|IL12RB1|ZBTB16|LEF1	-0.0710252	0	18	0	0	-2.51557	5.10245
1	-2.2415	GO:0035107	M1	1	0	GO Biological Processes	19	appendage morphogenesis	-2.2415	3.72341	3.48675	24155	148	263	6	2.28137	0.92068	2778|6664|7704|9742|26005|51176	GNAS|SOX11|ZBTB16|IFT140|C2CD3|LEF1	-0.0710252	0	18	0	0	-2.51557	5.10245
1	-2.2415	GO:0035108	M1	1	0	GO Biological Processes	19	limb morphogenesis	-2.2415	3.72341	3.48675	24155	148	263	6	2.28137	0.92068	2778|6664|7704|9742|26005|51176	GNAS|SOX11|ZBTB16|IFT140|C2CD3|LEF1	-0.0710252	0	18	0	0	-2.51557	5.10245
1	-2.19668	GO:1903706	M1	1	0	GO Biological Processes	19	regulation of hemopoiesis	-2.19668	2.31054	3.03308	24155	477	263	12	4.56274	1.28675	100|1385|2778|3020|3594|4004|5977|7704|9580|11091|28514|51176	ADA|CREB1|GNAS|H3-3A|IL12RB1|LMO1|DPF2|ZBTB16|SOX13|WDR5|DLL1|LEF1	-0.0710252	0	18	0	0	-2.51557	5.10245
1	-2.51303	GO:0046649	M1	1	0	GO Biological Processes	19	lymphocyte activation	-2.51303	2.1214	3.24161	24155	736	263	17	6.46388	1.51621	100|2047|3481|3594|4004|5290|6664|6722|7070|7704|7855|8326|8915|9580|22976|28514|51176	ADA|EPHB1|IGF2|IL12RB1|LMO1|PIK3CA|SOX11|SRF|THY1|ZBTB16|FZD5|FZD9|BCL10|SOX13|PAXIP1|DLL1|LEF1	-0.118219	0	19	1	1	-2.51303	7.06493
1	-2.29629	GO:0002683	M1	1	0	GO Biological Processes	19	negative regulation of immune system process	-2.29629	2.38041	3.14661	24155	463	263	12	4.56274	1.28675	100|1268|1843|5272|5802|5977|6664|7070|7704|8915|28514|79102	ADA|CNR1|DUSP1|SERPINB9|PTPRS|DPF2|SOX11|THY1|ZBTB16|BCL10|DLL1|RNF26	-0.0710252	0	19	0	0	-2.51303	7.06493
1	-2.27455	GO:0042110	M1	1	0	GO Biological Processes	19	T cell activation	-2.27455	2.36508	3.12194	24155	466	263	12	4.56274	1.28675	100|3481|3594|4004|5290|6722|7070|7704|7855|8915|9580|51176	ADA|IGF2|IL12RB1|LMO1|PIK3CA|SRF|THY1|ZBTB16|FZD5|BCL10|SOX13|LEF1	-0.0710252	0	19	0	0	-2.51303	7.06493
1	-2.16576	GO:0050870	M1	1	0	GO Biological Processes	19	positive regulation of T cell activation	-2.16576	3.18272	3.26843	24155	202	263	7	2.6616	0.992511	100|3481|3594|5290|7070|7704|8915	ADA|IGF2|IL12RB1|PIK3CA|THY1|ZBTB16|BCL10	-0.0652283	0	19	0	0	-2.51303	7.06493
1	-2.1098	GO:0050863	M1	1	0	GO Biological Processes	19	regulation of T cell activation	-2.1098	2.63247	3.05489	24155	314	263	9	3.42205	1.121	100|3481|3594|4004|5290|7070|7704|8915|9580	ADA|IGF2|IL12RB1|LMO1|PIK3CA|THY1|ZBTB16|BCL10|SOX13	-0.0652283	0	19	0	0	-2.51303	7.06493
1	-2.09422	GO:0050865	M1	1	0	GO Biological Processes	19	regulation of cell activation	-2.09422	2.08398	2.86172	24155	617	263	14	5.32319	1.3843	100|1268|3481|3594|4004|5155|5290|6664|7070|7704|8915|9580|22976|84630	ADA|CNR1|IGF2|IL12RB1|LMO1|PDGFB|PIK3CA|SOX11|THY1|ZBTB16|BCL10|SOX13|PAXIP1|TTBK1	-0.0599818	0	19	0	0	-2.51303	7.06493
1	-2.05875	GO:0050856	M1	1	0	GO Biological Processes	19	regulation of T cell receptor signaling pathway	-2.05875	7.06493	3.97696	24155	39	263	3	1.14068	0.654808	100|7070|8915	ADA|THY1|BCL10	-0.0531264	0	19	0	0	-2.51303	7.06493
1	-2.48994	GO:0009435	M1	1	0	GO Biological Processes	19	NAD biosynthetic process	-2.48994	6.56029	4.37057	24155	56	263	4	1.52091	0.754651	4837|10135|221937|283209	NNMT|NAMPT|FOXK1|PGM2L1	-0.118219	0	20	1	1	-2.48994	8.10389
1	-2.39595	GO:0009127	M1	1	0	GO Biological Processes	19	purine nucleoside monophosphate biosynthetic process	-2.39595	3.51316	3.58047	24155	183	263	7	2.6616	0.992511	100|204|539|8021|55746|221937|283209	ADA|AK2|ATP5PO|NUP214|NUP133|FOXK1|PGM2L1	-0.0904036	0	20	0	0	-2.48994	8.10389
1	-2.39595	GO:0009166	M1	1	0	GO Biological Processes	19	nucleotide catabolic process	-2.39595	3.51316	3.58047	24155	183	263	7	2.6616	0.992511	100|8021|10591|55746|56952|221937|283209	ADA|NUP214|DNPH1|NUP133|PRTFDC1|FOXK1|PGM2L1	-0.0904036	0	20	0	0	-2.48994	8.10389
1	-2.39595	GO:0009168	M1	1	0	GO Biological Processes	19	purine ribonucleoside monophosphate biosynthetic process	-2.39595	3.51316	3.58047	24155	183	263	7	2.6616	0.992511	100|204|539|8021|55746|221937|283209	ADA|AK2|ATP5PO|NUP214|NUP133|FOXK1|PGM2L1	-0.0904036	0	20	0	0	-2.48994	8.10389
1	-2.31994	GO:1901292	M1	1	0	GO Biological Processes	19	nucleoside phosphate catabolic process	-2.31994	3.40163	3.47765	24155	189	263	7	2.6616	0.992511	100|8021|10591|55746|56952|221937|283209	ADA|NUP214|DNPH1|NUP133|PRTFDC1|FOXK1|PGM2L1	-0.0710252	0	20	0	0	-2.48994	8.10389
1	-2.2556	GO:0019359	M1	1	0	GO Biological Processes	19	nicotinamide nucleotide biosynthetic process	-2.2556	3.74874	3.5072	24155	147	263	6	2.28137	0.92068	4837|8021|10135|55746|221937|283209	NNMT|NUP214|NAMPT|NUP133|FOXK1|PGM2L1	-0.0710252	0	20	0	0	-2.48994	8.10389
1	-2.2556	GO:0019363	M1	1	0	GO Biological Processes	19	pyridine nucleotide biosynthetic process	-2.2556	3.74874	3.5072	24155	147	263	6	2.28137	0.92068	4837|8021|10135|55746|221937|283209	NNMT|NUP214|NAMPT|NUP133|FOXK1|PGM2L1	-0.0710252	0	20	0	0	-2.48994	8.10389
1	-2.22536	R-HSA-165054	M1	1	0	Reactome Gene Sets	6	Rev-mediated nuclear export of HIV RNA	-2.22536	8.10389	4.34895	24155	34	263	3	1.14068	0.654808	5905|8021|55746	RANGAP1|NUP214|NUP133	-0.0710252	0	20	0	0	-2.48994	8.10389
1	-2.22344	GO:0009156	M1	1	0	GO Biological Processes	19	ribonucleoside monophosphate biosynthetic process	-2.22344	3.2635	3.34683	24155	197	263	7	2.6616	0.992511	100|204|539|8021|55746|221937|283209	ADA|AK2|ATP5PO|NUP214|NUP133|FOXK1|PGM2L1	-0.0710252	0	20	0	0	-2.48994	8.10389
1	-2.21367	GO:0072525	M1	1	0	GO Biological Processes	19	pyridine-containing compound biosynthetic process	-2.21367	3.67376	3.44639	24155	150	263	6	2.28137	0.92068	4837|8021|10135|55746|221937|283209	NNMT|NUP214|NAMPT|NUP133|FOXK1|PGM2L1	-0.0710252	0	20	0	0	-2.48994	8.10389
1	-2.18991	R-HSA-159230	M1	1	0	Reactome Gene Sets	6	Transport of the SLBP Dependant Mature mRNA	-2.18991	7.87235	4.26871	24155	35	263	3	1.14068	0.654808	7884|8021|55746	SLBP|NUP214|NUP133	-0.0710252	0	20	0	0	-2.48994	8.10389
1	-2.15558	R-HSA-177243	M1	1	0	Reactome Gene Sets	6	Interactions of Rev with host cellular proteins	-2.15558	7.65368	4.1916	24155	36	263	3	1.14068	0.654808	5905|8021|55746	RANGAP1|NUP214|NUP133	-0.0652283	0	20	0	0	-2.48994	8.10389
1	-2.09905	GO:0009124	M1	1	0	GO Biological Processes	19	nucleoside monophosphate biosynthetic process	-2.09905	3.09091	3.17751	24155	208	263	7	2.6616	0.992511	100|204|539|8021|55746|221937|283209	ADA|AK2|ATP5PO|NUP214|NUP133|FOXK1|PGM2L1	-0.0625427	0	20	0	0	-2.48994	8.10389
1	-2.07002	GO:0009123	M1	1	0	GO Biological Processes	19	nucleoside monophosphate metabolic process	-2.07002	2.44266	2.95807	24155	376	263	10	3.80228	1.17931	100|204|539|4695|8021|10591|55746|56952|221937|283209	ADA|AK2|ATP5PO|NDUFA2|NUP214|DNPH1|NUP133|PRTFDC1|FOXK1|PGM2L1	-0.0531264	0	20	0	0	-2.48994	8.10389
1	-2.01996	GO:0019674	M1	1	0	GO Biological Processes	19	NAD metabolic process	-2.01996	4.8339	3.51216	24155	76	263	4	1.52091	0.754651	4837|10135|221937|283209	NNMT|NAMPT|FOXK1|PGM2L1	-0.0254497	0	20	0	0	-2.48994	8.10389
1	-2.48859	GO:0032868	M1	1	0	GO Biological Processes	19	response to insulin	-2.48859	3.01678	3.52252	24155	274	263	9	3.42205	1.121	2170|3033|3481|5290|5296|7352|10135|11132|143686	FABP3|HADH|IGF2|PIK3CA|PIK3R2|UCP3|NAMPT|CAPN10|SESN3	-0.118219	0	21	1	1	-2.48859	3.01678
1	-2.48637	GO:0043434	M1	1	0	GO Biological Processes	19	response to peptide hormone	-2.48637	2.51628	3.35994	24155	438	263	12	4.56274	1.28675	1385|2170|3033|3481|5290|5296|5905|5968|7352|10135|11132|143686	CREB1|FABP3|HADH|IGF2|PIK3CA|PIK3R2|RANGAP1|REG1B|UCP3|NAMPT|CAPN10|SESN3	-0.118219	0	21	0	0	-2.48859	3.01678
1	-2.47818	GO:0061448	M1	1	0	GO Biological Processes	19	connective tissue development	-2.47818	3.00581	3.50982	24155	275	263	9	3.42205	1.121	2778|5155|5290|6722|7477|7704|10135|22976|85301	GNAS|PDGFB|PIK3CA|SRF|WNT7B|ZBTB16|NAMPT|PAXIP1|COL27A1	-0.114877	0	22	1	1	-2.47818	3.00581
1	-2.18011	GO:0090130	M1	1	0	GO Biological Processes	19	tissue migration	-2.18011	2.53713	3.09162	24155	362	263	10	3.80228	1.17931	58|70|5155|5217|5290|6722|9037|11156|22976|55612	ACTA1|ACTC1|PDGFB|PFN2|PIK3CA|SRF|SEMA5A|PTP4A3|PAXIP1|FERMT1	-0.0666867	0	22	0	0	-2.47818	3.00581
1	-2.44023	GO:0042692	M1	1	0	GO Biological Processes	19	muscle cell differentiation	-2.44023	2.61056	3.35105	24155	387	263	11	4.18251	1.23442	58|70|3020|3481|5155|6722|7140|10939|28514|79652|84814	ACTA1|ACTC1|H3-3A|IGF2|PDGFB|SRF|TNNT3|AFG3L2|DLL1|TMEM204|PLPP7	-0.101786	0	23	1	1	-2.44023	7.65368
1	-2.19636	GO:0006936	M1	1	0	GO Biological Processes	19	muscle contraction	-2.19636	2.55123	3.11121	24155	360	263	10	3.80228	1.17931	58|70|100|779|5290|6722|6769|7140|10008|10316	ACTA1|ACTC1|ADA|CACNA1S|PIK3CA|SRF|STAC|TNNT3|KCNE3|NMUR1	-0.0710252	0	23	0	0	-2.44023	7.65368
1	-2.17581	GO:0008015	M1	1	0	GO Biological Processes	19	blood circulation	-2.17581	2.20697	2.97892	24155	541	263	13	4.94297	1.33662	70|100|779|1268|5155|5290|7140|10008|10135|10242|11156|23576|28514	ACTC1|ADA|CACNA1S|CNR1|PDGFB|PIK3CA|TNNT3|KCNE3|NAMPT|KCNMB2|PTP4A3|DDAH1|DLL1	-0.0652283	0	23	0	0	-2.44023	7.65368
1	-2.15558	R-HSA-390522	M1	1	0	Reactome Gene Sets	6	Striated Muscle Contraction	-2.15558	7.65368	4.1916	24155	36	263	3	1.14068	0.654808	58|70|7140	ACTA1|ACTC1|TNNT3	-0.0652283	0	23	0	0	-2.44023	7.65368
1	-2.11245	GO:0003013	M1	1	0	GO Biological Processes	19	circulatory system process	-2.11245	2.16692	2.90717	24155	551	263	13	4.94297	1.33662	70|100|779|1268|5155|5290|7140|10008|10135|10242|11156|23576|28514	ACTC1|ADA|CACNA1S|CNR1|PDGFB|PIK3CA|TNNT3|KCNE3|NAMPT|KCNMB2|PTP4A3|DDAH1|DLL1	-0.0652283	0	23	0	0	-2.44023	7.65368
1	-2.08043	GO:0030239	M1	1	0	GO Biological Processes	19	myofibril assembly	-2.08043	5.03255	3.62027	24155	73	263	4	1.52091	0.754651	58|70|6722|7140	ACTA1|ACTC1|SRF|TNNT3	-0.0551432	0	23	0	0	-2.44023	7.65368
1	-2.05875	GO:0030049	M1	1	0	GO Biological Processes	19	muscle filament sliding	-2.05875	7.06493	3.97696	24155	39	263	3	1.14068	0.654808	58|70|7140	ACTA1|ACTC1|TNNT3	-0.0531264	0	23	0	0	-2.44023	7.65368
1	-2.05875	GO:0033275	M1	1	0	GO Biological Processes	19	actin-myosin filament sliding	-2.05875	7.06493	3.97696	24155	39	263	3	1.14068	0.654808	58|70|7140	ACTA1|ACTC1|TNNT3	-0.0531264	0	23	0	0	-2.44023	7.65368
1	-2.37592	GO:0043255	M1	1	0	GO Biological Processes	19	regulation of carbohydrate biosynthetic process	-2.37592	4.73423	3.86637	24155	97	263	5	1.90114	0.842095	3481|5155|11091|79660|221937	IGF2|PDGFB|WDR5|PPP1R3B|FOXK1	-0.0898276	0	24	1	1	-2.37592	7.44682
1	-2.12232	GO:0032885	M1	1	0	GO Biological Processes	19	regulation of polysaccharide biosynthetic process	-2.12232	7.44682	4.11739	24155	37	263	3	1.14068	0.654808	3481|5155|79660	IGF2|PDGFB|PPP1R3B	-0.0652283	0	24	0	0	-2.37592	7.44682
1	-2.12099	GO:0006109	M1	1	0	GO Biological Processes	19	regulation of carbohydrate metabolic process	-2.12099	3.12092	3.20745	24155	206	263	7	2.6616	0.992511	3481|5155|8021|11091|55746|79660|221937	IGF2|PDGFB|NUP214|WDR5|NUP133|PPP1R3B|FOXK1	-0.0652283	0	24	0	0	-2.37592	7.44682
1	-2.33046	GO:0009880	M1	1	0	GO Biological Processes	19	embryonic pattern specification	-2.33046	5.92543	4.07418	24155	62	263	4	1.52091	0.754651	7704|7855|26005|28514	ZBTB16|FZD5|C2CD3|DLL1	-0.0736192	0	25	1	1	-2.33046	5.92543
1	-2.00678	GO:0007368	M1	1	0	GO Biological Processes	19	determination of left/right symmetry	-2.00678	3.859	3.28021	24155	119	263	5	1.90114	0.842095	6722|9742|26005|28514|138162	SRF|IFT140|C2CD3|DLL1|C9orf116	-0.0176219	0	25	0	0	-2.33046	5.92543
1	-2.27323	GO:0042593	M1	1	0	GO Biological Processes	19	glucose homeostasis	-2.27323	3.02367	3.32646	24155	243	263	8	3.04183	1.05896	1268|5290|5296|6722|8938|90550|143686|221937	CNR1|PIK3CA|PIK3R2|SRF|BAIAP3|MCU|SESN3|FOXK1	-0.0710252	0	26	1	1	-2.27323	8.34946
1	-2.26274	GO:0033500	M1	1	0	GO Biological Processes	19	carbohydrate homeostasis	-2.26274	3.01128	3.31295	24155	244	263	8	3.04183	1.05896	1268|5290|5296|6722|8938|90550|143686|221937	CNR1|PIK3CA|PIK3R2|SRF|BAIAP3|MCU|SESN3|FOXK1	-0.0710252	0	26	0	0	-2.27323	8.34946
1	-2.26202	M266	M1	1	0	Canonical Pathways	11	PID NCADHERIN PATHWAY	-2.26202	8.34946	4.43253	24155	33	263	3	1.14068	0.654808	747|1268|5290	DAGLA|CNR1|PIK3CA	-0.0710252	0	26	0	0	-2.27323	8.34946
1	-2.27116	R-HSA-1852241	M1	1	0	Reactome Gene Sets	6	Organelle biogenesis and maintenance	-2.27116	2.79256	3.25566	24155	296	263	9	3.42205	1.121	539|1385|5147|5565|9742|22981|26005|54927|84617	ATP5PO|CREB1|PDE6D|PRKAB2|IFT140|NINL|C2CD3|CHCHD3|TUBB6	-0.0710252	0	27	1	1	-2.27116	8.34946
1	-2.26202	GO:0042407	M1	1	0	GO Biological Processes	19	cristae formation	-2.26202	8.34946	4.43253	24155	33	263	3	1.14068	0.654808	539|10939|54927	ATP5PO|AFG3L2|CHCHD3	-0.0710252	0	27	0	0	-2.27116	8.34946
1	-2.25736	GO:0014823	M1	1	0	GO Biological Processes	19	response to activity	-2.25736	5.65195	3.94021	24155	65	263	4	1.52091	0.754651	867|1385|3033|7352	CBL|CREB1|HADH|UCP3	-0.0710252	0	28	1	1	-2.25736	5.65195
1	-2.15943	GO:1990845	M1	1	0	GO Biological Processes	19	adaptive thermogenesis	-2.15943	3.57834	3.36769	24155	154	263	6	2.28137	0.92068	1149|2778|3033|5565|7351|7352	CIDEA|GNAS|HADH|PRKAB2|UCP2|UCP3	-0.0652283	0	28	0	0	-2.25736	5.65195
1	-2.18991	GO:1904031	M1	1	0	GO Biological Processes	19	positive regulation of cyclin-dependent protein kinase activity	-2.18991	7.87235	4.26871	24155	35	263	3	1.14068	0.654808	5155|84630|151195	PDGFB|TTBK1|CCNYL1	-0.0710252	0	29	1	1	-2.18991	7.87235
1	-2.16585	GO:0051865	M1	1	0	GO Biological Processes	19	protein autoubiquitination	-2.16585	5.3243	3.77402	24155	69	263	4	1.52091	0.754651	7322|7337|11342|127544	UBE2D2|UBE3A|RNF13|RNF19B	-0.0652283	0	30	1	1	-2.16585	5.3243
1	-2.14447	GO:0000209	M1	1	0	GO Biological Processes	19	protein polyubiquitination	-2.14447	2.66644	3.09826	24155	310	263	9	3.42205	1.121	867|7174|7322|7337|9666|64718|79102|92305|127544	CBL|TPP2|UBE2D2|UBE3A|DZIP3|UNKL|RNF26|TMEM129|RNF19B	-0.0652283	0	30	0	0	-2.16585	5.3243
1	-2.16399	GO:0018108	M1	1	0	GO Biological Processes	19	peptidyl-tyrosine phosphorylation	-2.16399	2.52319	3.07216	24155	364	263	10	3.80228	1.17931	867|2047|3481|4908|5155|7070|9031|9833|57410|84630	CBL|EPHB1|IGF2|NTF3|PDGFB|THY1|BAZ1B|MELK|SCYL1|TTBK1	-0.0652283	0	31	1	1	-2.16399	2.52319
1	-2.14006	GO:0018212	M1	1	0	GO Biological Processes	19	peptidyl-tyrosine modification	-2.14006	2.50256	3.04322	24155	367	263	10	3.80228	1.17931	867|2047|3481|4908|5155|7070|9031|9833|57410|84630	CBL|EPHB1|IGF2|NTF3|PDGFB|THY1|BAZ1B|MELK|SCYL1|TTBK1	-0.0652283	0	31	0	0	-2.16399	2.52319
1	-2.13039	GO:0015696	M1	1	0	GO Biological Processes	19	ammonium transport	-2.13039	4.13712	3.47565	24155	111	263	5	1.90114	0.842095	100|1268|9066|113451|283130	ADA|CNR1|SYT7|AZIN2|SLC25A45	-0.0652283	0	32	1	1	-2.13039	4.13712
1	-2.11434	GO:0017158	M1	1	0	GO Biological Processes	19	regulation of calcium ion-dependent exocytosis	-2.11434	4.10018	3.45023	24155	112	263	5	1.90114	0.842095	1268|5217|8938|9066|140730	CNR1|PFN2|BAIAP3|SYT7|RIMS4	-0.0652283	0	33	1	1	-2.11434	4.10018
1	-2.0638	GO:0050804	M1	1	0	GO Biological Processes	19	modulation of chemical synaptic transmission	-2.0638	2.31717	2.91194	24155	436	263	11	4.18251	1.23442	1268|1385|2047|3814|4908|5217|5802|6722|8938|9066|140730	CNR1|CREB1|EPHB1|KISS1|NTF3|PFN2|PTPRS|SRF|BAIAP3|SYT7|RIMS4	-0.0531264	0	33	0	0	-2.11434	4.10018
1	-2.0568	GO:0099177	M1	1	0	GO Biological Processes	19	regulation of trans-synaptic signaling	-2.0568	2.31187	2.9036	24155	437	263	11	4.18251	1.23442	1268|1385|2047|3814|4908|5217|5802|6722|8938|9066|140730	CNR1|CREB1|EPHB1|KISS1|NTF3|PFN2|PTPRS|SRF|BAIAP3|SYT7|RIMS4	-0.0531264	0	33	0	0	-2.11434	4.10018
